# Supplementary material for: Biosorption and Bioleaching of Heavy Metals from Electronic Waste Varied with Microbial Genera
Source: MDPI journal article supplement (doi:10.3390/su14020935), 2022-01-14
Supplement: s1 [file s1]

Archive with 1 entries (1 files):
- sustainability-1527334-supplementary.pdf
