# Supplementary material for: Biosorption and Bioleaching of Heavy Metals from Electronic Waste Varied with Microbial Genera
Source: MDPI journal article supplement (doi:10.3390/su14020935), 2022-01-14
Supplement: s1 [file s1 › sustainability-1527334-supplementary.pdf]

# Biosorption and Bioleaching of Heavy Metals from Electronic Waste Varied with Microbial Genera

**Table S1.** Advantages and Disadvantages of conventional and biological methods for efficient metal recovery from e-waste.

| Conventional methods     | Advantages                                                                                                                                                                                                                                                   | Disadvantages                                                                                                                                                                                                                                                                                            | References |
|--------------------------|--------------------------------------------------------------------------------------------------------------------------------------------------------------------------------------------------------------------------------------------------------------|----------------------------------------------------------------------------------------------------------------------------------------------------------------------------------------------------------------------------------------------------------------------------------------------------------|------------|
| Chemical precipitation   | <ul style="list-style-type: none"> <li>Integrated physico-chemical process,</li> <li>low capital cost,</li> <li>simple in operation,</li> <li>adaptive to high pollutant loads,</li> <li>efficient for removal of metals and fluorides</li> </ul>            | <ul style="list-style-type: none"> <li>Inefficient for metals present in less amount,</li> <li>pH dependent</li> <li>requires chemicals such as lime, oxidants and hydrogen sulfide, oxidation required if metals are complexed,</li> <li>maximum sludge generation during the entire process</li> </ul> | [5,6]      |
|                          |                                                                                                                                                                                                                                                              | <ul style="list-style-type: none"> <li>requires extra cost for sludge management</li> </ul>                                                                                                                                                                                                              |            |
| Coagulation/Flocculation | <ul style="list-style-type: none"> <li>Integrated physico-chemical technique,</li> <li>simple process,</li> <li>low capital cost,</li> <li>efficient for removal of soluble, insoluble metals and colloidal particles</li> </ul>                             | <ul style="list-style-type: none"> <li>pH dependent</li> <li>requires non-reusable chemicals,</li> <li>maximum sludge generation</li> <li>requires extra cost for sludge management</li> <li>not efficient for As removal</li> </ul>                                                                     | [7,8]      |
|                          |                                                                                                                                                                                                                                                              | <ul style="list-style-type: none"> <li>High operational cost (maintenance and initial cost of the resin),</li> </ul>                                                                                                                                                                                     |            |
| Ion exchange             | <ul style="list-style-type: none"> <li>Technologically simple process,</li> <li>rapid,</li> <li>efficient process for removal of valuable metals up to ppb levels,</li> <li>can be integrated with other processes (precipitation and filtration)</li> </ul> | <ul style="list-style-type: none"> <li>not efficient for dispersal dyes and drugs,</li> <li>large volume requires large columns,</li> <li>rapid saturation and clogging of the reactor,</li> <li>easily contaminated with organic matter, oils</li> </ul>                                                | [9]        |
|                          |                                                                                                                                                                                                                                                              | <ul style="list-style-type: none"> <li>requires physico-chemical pretreatment</li> </ul>                                                                                                                                                                                                                 |            |
| Filtration               | <ul style="list-style-type: none"> <li>Simple process,</li> <li>smaller space requirement,</li> <li>high separation selectivity with fast kinetics,</li> <li>efficient for removal of wide range of pollutants</li> </ul>                                    | <ul style="list-style-type: none"> <li>High operational cost due to reactor clogging,</li> <li>require several types of adsorbents,</li> <li>regeneration is quite costly and results in loss of material,</li> </ul>                                                                                    | [6]        |
|                          |                                                                                                                                                                                                                                                              |                                                                                                                                                                                                                                                                                                          |            |

|                    |                                                                                                                                                                                                                                                                                                                                                                                                             |                                                                                                                                                                                                                                                                           |         |
|--------------------|-------------------------------------------------------------------------------------------------------------------------------------------------------------------------------------------------------------------------------------------------------------------------------------------------------------------------------------------------------------------------------------------------------------|---------------------------------------------------------------------------------------------------------------------------------------------------------------------------------------------------------------------------------------------------------------------------|---------|
|                    |                                                                                                                                                                                                                                                                                                                                                                                                             | <ul style="list-style-type: none"> <li>not efficient for certain metals and dye stuffs</li> </ul>                                                                                                                                                                         |         |
| Electro-dialysis   | <ul style="list-style-type: none"> <li>Simple process,</li> <li>efficient even at high concentration,</li> <li>no chemicals required,</li> <li>efficient for removal of dyes, salts, minerals and dissolved inorganic matter with high separation selectivity</li> </ul>                                                                                                                                    | <ul style="list-style-type: none"> <li>High maintenance cost</li> <li>high energy requirement,</li> <li>specific process,</li> <li>rapid clogging of membrane,</li> <li>limited flow rates</li> <li>low throughput</li> </ul>                                             | [10]    |
| Photo-catalysis    | <ul style="list-style-type: none"> <li>Simple,</li> <li>highly efficient process for removal of organic pollutants and metals simultaneously,</li> <li>production of energy</li> </ul>                                                                                                                                                                                                                      | <ul style="list-style-type: none"> <li>Initial investment costs,</li> <li>formation of dioxins and other pollutants,</li> <li>high operational and maintenance cost,</li> <li>limited applications</li> </ul>                                                             | [11]    |
| Biological methods | <ul style="list-style-type: none"> <li>Low cost,</li> <li>high efficiency,</li> <li>potential metal recovery,</li> <li>regeneration of biosorbent,</li> <li>economically attractive,</li> <li>non-requirement of additional nutrient,</li> <li>utilization of large number of microbial species either in pure or mixed cultures,</li> <li>environment-friendly,</li> <li>minimization of sludge</li> </ul> | <ul style="list-style-type: none"> <li>Possibility of bio-transformation or biodegradation,</li> <li>slow process, complexity of microbiological mechanisms,</li> <li>necessary to maintain optimized conditions,</li> <li>possible sludge bulking and foaming</li> </ul> | [12–14] |

**Table S2.** Research studies emphasizing the potential of biological remediation of the E-waste.

| Physico chemical practices                                                                                                                                                                                                                                                                                                                                                                                                                                                                                                                                                                                                                                                                                                                                                                                   | Biological practices                                                                                                                                                                                                     | Remarks                 |
|--------------------------------------------------------------------------------------------------------------------------------------------------------------------------------------------------------------------------------------------------------------------------------------------------------------------------------------------------------------------------------------------------------------------------------------------------------------------------------------------------------------------------------------------------------------------------------------------------------------------------------------------------------------------------------------------------------------------------------------------------------------------------------------------------------------|--------------------------------------------------------------------------------------------------------------------------------------------------------------------------------------------------------------------------|-------------------------|
| <ul style="list-style-type: none"> <li>Hydrometallurgy: Gold mining involves use of leach reagent i.e. cyanide               <ul style="list-style-type: none"> <li>Exhibits high gold recovery</li> <li>Robust and low cost</li> <li>environmental damage</li> </ul> </li> <li>mismanagement produces noxious side products which tempers recycling process               <ul style="list-style-type: none"> <li>Cu, Pb and Sn recovery from scrap printed circuit boards (PCBs) by combination of leaching, electrochemical ion exchange and electrodeposition</li> </ul> </li> <li>Use of aq. <math>\text{HNO}_3</math> stripping solution for Cu and Pb extraction</li> <li>Sn precipitation as <math>2\text{SnO}_3</math> at high acid concentrations (<math>&gt;4 \text{ M dm}^{-3}</math>)</li> </ul> | <ul style="list-style-type: none"> <li>No leaching agents are required</li> <li>Microorganisms themselves act as leaching agents</li> <li>Environment-prudent</li> <li>No huge capital investment is required</li> </ul> | <p>[25]</p> <p>[26]</p> |

- Poor current efficiency due to cathodic Pb deposition
  - Requirement of huge capital investment
  - Physical processes require low capital
  - suffer from huge metal loss (10-35%)
  - brominated flame retardant dust problem
  - No Brominated flame retardant dust problem was observed
- [27]
-
